1 **FIRST DETECTION OF SARS-COV-2 IN UNTREATED WASTEWATERS IN ITALY**

2

3 Giuseppina La Rosa<sup>1\*</sup>, Marcello Iaconelli<sup>1</sup>, Pamela Mancini<sup>1</sup>, Gius Bonanno Ferraro<sup>1</sup>, Carolina

4 Veneri<sup>1</sup>, Lucia Bonadonna<sup>1</sup>, Luca Lucentini<sup>1</sup>, Elisabetta Suffredini<sup>2</sup>

5

6

7 <sup>1</sup> Department of Environment and Health - Istituto Superiore di Sanità, Rome, Italy

8 <sup>2</sup> Department of Food Safety, Nutrition and Veterinary Public Health, Istituto Superiore di Sanità,

9 Rome, Italy

10

11

12

13

14

15 **Keywords:** SARS-CoV-2, Coronavirus, COVID-19, sewage, wastewater, surveillance

---

\* **Corresponding author:** Giuseppina La Rosa

Istituto Superiore di Sanità, Department of Environment and Health, Viale Regina Elena 299, 00161, Rome, Italy.  
Phone/Fax: 0039-06-49902718. E-mail: giuseppina.larosa@iss.it

16 **ABSTRACT**

17

18 Several studies have demonstrated the advantages of environmental surveillance through the  
19 monitoring of sewer systems for the assessment of viruses circulating in a given community  
20 (wastewater-based epidemiology, WBE).

21 During the COVID-19 public health emergency, many reports have described the presence of  
22 SARS-CoV-2 RNA in stools from COVID-19 patients, and a few studies reported the occurrence of  
23 SARS-CoV-2 in wastewaters worldwide. Italy is among the world's worst-affected countries in the  
24 COVID-19 pandemic, but so far there are no studies assessing the presence of SARS-CoV-2 in  
25 Italian wastewaters. To this aim, twelve influent sewage samples, collected between February and  
26 April 2020 from Wastewater Treatment Plants in Milan and Rome, were tested adapting, for  
27 concentration, the standard WHO procedure for Poliovirus surveillance. Molecular analysis was  
28 undertaken with three nested protocols, including a newly designed SARS-CoV-2 specific primer  
29 set.

30 SARS-CoV-2 RNA detection occurred in volumes of 250 mL of wastewaters collected in both areas  
31 at high (Milan) and low (Rome) epidemic circulation, according to clinical data. Overall, 6 out of  
32 12 samples were positive. One of the positive results was obtained in a Milan wastewater sample  
33 collected a few days after the first notified Italian case of autochthonous SARS-CoV-2.

34 The study shows that WBE has the potential to be applied to SARS-CoV-2 as a sensitive tool to  
35 study spatial and temporal trends of virus circulation in the population.

36

## 37 INTRODUCTION

38

39 Severe Acute Respiratory Syndrome Coronavirus 2 (SARS-CoV-2) is responsible for the  
40 coronavirus disease COVID-19, a public health emergency worldwide. On March 11 2020, the  
41 World Health Organization declared COVID-19 a pandemic. Italy is among the world's most  
42 affected countries in the COVID-19 pandemic. Indeed, after entering Italy, COVID-19 has been  
43 spreading fast. As of April 20<sup>th</sup> 2020, the total number of cases reported by the authorities reached  
44 181,228, with 108,237 active cases (Dipartimento della Protezione Civile, Bulletin 20.04.2020),  
45 mainly located in Northern Italy (Lombardy, and its neighbouring regions of Emilia-Romagna and  
46 Piedmont).

47 Presymptomatic and paucisymptomatic carriers, mostly undetected in clinical and laboratory  
48 surveillance systems, contribute to the spread of the disease (Bay et al., 2020; Nicastri et al., 2020;  
49 Rothe et al., 2020; WHO, 2020) and hamper the efforts made to assess the extent of SARS-CoV-2  
50 circulation in the population and to control efficiently virus transmission. Analytical regular  
51 investigation of wastewaters provides valuable information to measure viral circulation in the  
52 population as Wastewater Treatment Plants (WWTPs), collecting and concentrating human excreta,  
53 are useful sampling points receiving discharges from the entire community.

54 Environmental microbiologists have studied pathogens in sewage for decades (La Rosa & Muscillo,  
55 2012; Sinclair *et al.*, 2008). The screening of wastewater, as a public health surveillance tool,  
56 defined as wastewater-based epidemiology (WBE), is currently well recognized (Xagorarakis &  
57 O'Brien, 2020). In the recent years, scientists have applied WBE to a wide range of waterborne,  
58 foodborne and fecal-oral viruses, which infected individuals usually excrete in high concentration  
59 with faeces (Katayama et al., 2008; Iaconelli et al., 2017; Bisseaux et al., 2018). However, the  
60 concept of WBE can also be applied to viruses beyond those commonly associated with the faecal-  
61 oral route (i.e. enteric viruses), since viral shedding may involve different body fluids ultimately  
62 discharged into urban sewage.

63 Some studies have reported the presence of virus RNA in the stools of COVID-19 patients in  
64 percentages ranging from 16.5% to 100% at a concentration up to 6.8 log<sub>10</sub> genome copies/g of  
65 stool (Chen et al., 200; Lo et al., 2000; Han et al., 2000; Lescure et al., 2000). Furthermore,  
66 preliminary studies have reported the detection of SARS-CoV-2 RNA in wastewater in The  
67 Netherlands (Medema *et al.*, 2020), France (Wurtzer et al., 2020), USA (Wu et al., 2020), and  
68 Australia (Ashmed et al., 2020). To date, no study has yet provided insights into the presence of  
69 SARS-CoV-2 in wastewaters in Italy.

70 Herein we report the results of the screening for SARS-CoV-2 presence in sewage samples  
71 collected between the end of February and the beginning of April 2020 from WWTPs in Milan  
72 (Northern Italy) and Rome (Central Italy).

73

74

75

## 76 MATERIAL AND METHODS

77

78 Twelve raw sewage samples were collected between the 3<sup>rd</sup> of February and the 2<sup>nd</sup> of April 2020  
79 from three WWTPs, located in Milan (two distinct plants, reported as A and B) and in Rome (one  
80 plant receiving two different pipelines, C1 and C2, from different districts of the town),  
81 respectively. The samples (24-hour composites) were collected from the WWTP influent,  
82 immediately stored at -20 °C, and dispatched frozen to the National Institute of Health for analysis.

83 Before viral concentration, samples underwent a 30 min treatment at 57 °C to increase the safety of  
84 the analytical protocol for the laboratory personnel and environment, as Pastorino et al. (2020)  
85 reported these conditions to reduce the virulence of the virus by over 5 log.

86 Sample concentration took place using a two-phase (PEG-dextran method) separation as detailed in  
87 the 2003 WHO Guidelines for Environmental Surveillance of Poliovirus protocol (WHO, 2003),  
88 with modifications to adapt the protocol to enveloped viruses. In brief, the wastewater sample (250

89 mL) was centrifuged to pellet the wastewater solids, retaining the pellet for further processing. The  
90 clarified wastewater was mixed with dextran and polyethylene glycol (PEG), and the mixture was  
91 left to stand overnight at 4 °C in a separation funnel. The bottom layer and the interphase were then  
92 collected drop-wise, and this concentrate was added to the pellet from the initial centrifugation. The  
93 chloroform treatment that the WHO protocol envisages at this stage was omitted; this preserved the  
94 integrity of the enveloped viruses object of this study. The viral nucleic acids extraction foresaw the  
95 use of the NucliSENS miniMAG semi-automated extraction system with magnetic silica carried out  
96 following manufacturer's instructions (bioMerieux, Marcy l'Etoile, France) with however slight  
97 modifications. The lysis phase was prolonged to 20 minutes, and brief centrifugation ( $2000 \times g$ , 1  
98 min) was used to pellet the sediment; subsequently, magnetic silica beads were added to the cleaned  
99 supernatant. Before molecular tests, the extracted nucleic acids were further purified by PCR  
100 inhibitors using the OneStep PCR Inhibitor Removal Kit (Zymo Research, CA, USA).

101 In the absence of a standardized method for SARS-CoV-2 detection in environmental samples,  
102 RNAs were tested for the presence of SARS-CoV-2 using three different PCR assays (Table 1 and  
103 Figure 1):

- 104 a) a broad range of PCR for Coronavirus detection targeting the ORF1ab (Ar Gouilh et al.,  
105 2018). Primers were previously designed targeting a highly conserved region (nsp12)  
106 among all Coronavirinae sequences to detect a broad range of coronaviruses by a semi-  
107 nested PCR producing a fragment of 218 bp.
- 108 b) a newly designed primer set specific for SARS-CoV-2. Novel nested primers, amplifying a  
109 332 bp fragment of ORF1ab, were designed using prime3 software (<http://primer3.ut.ee/>).  
110 For the assays a) and b) first-strand cDNA was synthesized using Super Script IV Reverse  
111 Transcriptase (ThermoFisher Scientific) with the reverse primer. PCR reaction was  
112 performed using 2.5 µl of cDNA in a final volume of 25 µl (Kit Platinum™ SuperFi™  
113 Green PCR Master Mix, Thermo), using 1 µl of primers (10 µM). The PCR conditions were  
114 as follows: 98 °C for 30 sec; 35 cycles of 98 °C for 10 sec, 50 °C and 54 °C for 10 sec for

115 assay a) and b) respectively, and 72 °C for 30 sec; final extension 72 °C for 5 min. After the  
116 first round PCR, nested PCR was performed using 2 µl of first PCR product and under the  
117 same reaction composition and thermal profile conditions. A synthetic DNA (Biofab  
118 Research) including the PCR target region, was used to set up PCR conditions before  
119 experiments with study samples, but was not amplified along with samples to avoid risks of  
120 PCR contamination . Molecular grade water was used as the negative control.

121 c) a published nested RT-PCR for SARS-CoV-2 targeting the spike region (Nao et al., 2020).  
122 cDNA was synthesized from 5 µl of sample RNA, using SuperScript III Reverse  
123 Transcriptase (ThermoFisher Scientific), 0.5 µM of the reverse primer (WuhanCoV-spk2-r,  
124 Table 1) and a 50 min reaction at 50 °C (20 µl final volume). First PCR reaction was  
125 performed by adding the reaction mix (Dream Taq polymerase and buffer from  
126 ThermoFisher Scientific, 0.4 µM of primers WuhanCoV-spk2-r and WuhanCoV-spk1-f)  
127 directly to the whole volume of synthesized cDNA. The used PCR conditions were as  
128 follows: 95°C for 1 min; 35 cycles of 95 °C for 30 sec, 56 °C for 30 sec, and 72 °C for 40  
129 sec; final extension 72 °C for 5 min. Nested PCR (primers NIID\_WH-1\_F24381 and  
130 NIID\_WH-1\_R24873) was performed in a total volume of 50 µl using 5 µl of first PCR  
131 product, with the same conditions applied for the first PCR and 45 cycles.

132 All positive samples were retested for confirmation of results. The PCR products were revealed by  
133 electrophoresis on 2% agarose gels and were purified using a Montage PCRm96 Microwell Filter  
134 Plate (Millipore, Billerica, MA, USA) and then direct sequenced on both strands (BioFab Research,  
135 Rome, Italy). Sequences were identified in terms of the closest homology sequence using BLAST  
136 <https://blast.ncbi.nlm.nih.gov/Blast.cgi>. All Italian SARS-CoV-2 genome sequences available at the  
137 time of analysis were retrieved from Gisaid (<https://www.gisaid.org/>) for comparison with study  
138 sequences, using the MEGA X software (Kumar *et al.*, 2018)..

139 Sequences were submitted to NCBI GenBank with the accession numbers: [GenBank submission  
140 ID 2337138 and 2337168].

141

## 142 **RESULTS AND DISCUSSION**

143

144 The 50% (6/12) of the wastewater samples showed positive results for SARS-CoV-2 RNA (Table  
145 2). Both the published and newly designed SARS-CoV-2 specific primer sets detected bands of the  
146 expected size and were confirmed by the sequencing. In contrast, only aspecific products were  
147 detected with a broad range assay for coronavirus. Upon comparison of broad range primers with  
148 SARS-CoV-2 genome, we noted that they showed only 77.1 to 91.3 % nt identity, which explain  
149 why these were not able to amplify the novel coronavirus.

150 SARS-CoV-2 RNA was first detected with a weak amplification signal in an influent sample from  
151 Milan WWTPs (Lombardy, North Italy) collected on February 24<sup>th</sup> from the plant A with the  
152 ORF1ab assay. A positive result for SARS-CoV-2 was also detected this time with a strong  
153 amplification signal, on February 28<sup>th</sup> from the plant B, with both the ORF1ab and the Spike  
154 regions. In the influent samples taken from the WWTP in Rome (Latium, Central Italy), SARS-  
155 CoV-2 was detected in both the sampling dates (31<sup>st</sup> of March and 2<sup>nd</sup> of April) and both the  
156 pipelines, C1 and C2, using the newly designed primer sets specific for SARS-CoV-2. The analyzed  
157 sequences showed, for both ORF1ab and S partial gene regions, 100% identity with the first SARS-  
158 CoV-2 sequence detected in Italy (MT066156), isolated on 30<sup>th</sup> January 2020 from a Chinese tourist  
159 by the Institute “Lazzaro Spallanzani” (INMI, Rome). Given the high level of conservation of the  
160 two analysed regions, 100% identity was also detected with several sequences in GenBank and with  
161 all the other Italian SARS-CoV-2 genomes deposited in Gisaid.

162 Significantly, on February 24<sup>th</sup> and 28<sup>th</sup>, when the samples positive for SARS-CoV-2 were collected  
163 in Milan, COVID-19 infections were still limited in Italy, the first Italian autochthonous SARS-  
164 CoV-2 positive case having been reported only a few days earlier, on February 21<sup>st</sup>. On February  
165 28<sup>th</sup>, the total number of SARS-CoV-2 positive patients reported in all Italy was only 888, with 531  
166 (57%) in Lombardy, the most affected region in the country. However, at that time, the vast

167 majority of cases in Lombardy were recorded in the provinces of Lodi, Cremona and Bergamo  
168 (182, 123, and 103 cases, respectively). In comparison, in the province of Milan (an even larger  
169 area compared to the metropolitan area served by the selected WWTPs) only 29 cases had been  
170 reported (Dipartimento della Protezione Civile, Bulletin 28.02.2020).

171 These results provide evidence of the sensitivity of environmental surveillance for the detection of  
172 ongoing outbreaks in the population. Virus detection in sewage, despite the low incidence of  
173 reported human infections, may be associated with the ability of environmental surveillance to  
174 detect mild, subclinical, or asymptomatic cases. These infected individuals shed viruses into local  
175 sewage systems and contribute to virus circulation while remaining substantially undetectable by  
176 clinical surveillance, a phenomenon known as the “surveillance pyramid” (Martinez Wassaf et al.,  
177 2014). Clinical surveillance, indeed, only captures the tip of the iceberg of viral diseases  
178 (hospitalized patients or laboratory diagnosed cases). In contrast, monitoring of urban wastewaters  
179 makes it possible to capture the full extent of the diseases at a community level.

180 As regards to the influent samples collected in Rome, SARS-CoV-2 detection was obtained on  
181 March 31, when the epidemic had spread considerably in Italy. In that date, a total of 77.635 SARS-  
182 CoV-2 infections had been reported in Italy, of which 3.095 in Latium Region and 2.186 in the  
183 province of Rome (Dipartimento della Protezione Civile, Bulletin 31.03.2020), with about 85% of  
184 them being active cases (Assessorato alla Sanità e all’Integrazione Socio Sanitaria della Regione  
185 Lazio; Ministero della Salute, Bulletin 31.03.2020). Given this diffusion of the virus, with such  
186 several excreting patients (symptomatic and asymptomatic), the detection of the viral RNA in the  
187 tested samples is not surprising and, consistently, the samples taken two days later, on the 2<sup>nd</sup> April,  
188 at the same WWTP were still positive for SARS-CoV-2 RNA.

189 Following this investigation on the occurrence of SARS-CoV-2 RNA in sewage, the production of  
190 quantitative data on virus concentration in raw sewage will be undertaken. This approach will allow  
191 obtaining a rough estimation of the total number of subjects excreting the virus, by integrating - as  
192 done by Wu and co-workers in samples taken in the United States (Wu et al., 2020) - the available



193 information on viral shedding rates, WWTPs loads, and virus concentration in wastewaters.  
194 Moreover, the environmental surveillance will be extended to the collection of wastewater samples  
195 available in the Department of Environment and Health of the Italian National Health Institute, that  
196 were collected throughout Italy in the framework of different projects on enteric viruses. Such  
197 monitoring will provide a picture of the SARS-CoV-2 circulation across the different regions of  
198 Italy and over time, to better understand the virus circulation, as provided by wastewater-based  
199 epidemiology (WBE) and compare it to the clinical data. Samples collected before the reporting of  
200 the first known Italian case on February 21 will also be tested, to possibly infer when SARS-CoV-2  
201 first appeared in Italy. In a previous study, indeed, wastewater monitoring provided evidence that a  
202 novel variant of Norovirus GII.17 (termed Kawasaki 2014) had been circulating in the Italian  
203 population before its first appearance and identification in clinical cases, later becoming one of the  
204 prevalent variants in the population (Suffredini et al., 2018).

205 Also and most important, environmental monitoring of SARS-CoV-2 in sewages will continue  
206 when the emergency phase is over, and its circulation in the population will be considered limited.  
207 Indeed, sewage surveillance could also serve for the early detection of a possible re-emergence of  
208 COVID-19 in urban areas. WHO recommends environmental surveillance for poliovirus as an early  
209 warning system. As an example, during 2013, Israel observed the silent reintroduction and  
210 transmission of wild poliovirus type 1, detected through routine environmental surveillance  
211 performed on sewage samples ([https://www.who.int/csr/don/2013\\_09\\_20\\_polio/en/](https://www.who.int/csr/don/2013_09_20_polio/en/)) without the  
212 reporting of any clinical cases. Environmental monitoring, therefore, appears to be an effective  
213 measure for proving early warning against pathogen reintroduction.

214 In conclusions, the main findings of this study are:

- 215 1) first detection of SARS-CoV-2 RNA fragments in sewage in Italy;
- 216 2) demonstration of the suitability of the WHO protocol for sewage treatment to enveloped  
217 viruses after appropriate modifications;

218 3) design of a novel nested PCR assay specific for SARS-CoV-2, useful for screening  
219 purposes.

220 Further research will clarify the applicability of WBE to SARS-CoV-2 for prompt detection, the  
221 study, and the assessment of viral outbreaks.

222

223

224 **Table 1: Primers and amplification protocols used in the study**

| Target                  | Region | Primer Name       | Nucleotide sequence        | Orientation | Usage      | Amplicon size (bp) | Reference         |
|-------------------------|--------|-------------------|----------------------------|-------------|------------|--------------------|-------------------|
| Broad-range Coronavirus | ORF1ab | Bat-CoV pol 15197 | GGTTGGGAYTAYCCWAARTGTGA    | +           | First PCR  | 440                | Ar Gouilh et al., |
|                         |        | Bat-CoV pol 15635 | CCATCRTCMGAHARAATCATCATA   | -           |            |                    |                   |
|                         |        | Bat-CoV pol 15419 | GTGCTAAACCACCGCCTG         | +           | Nested PCR | 218                |                   |
|                         |        | Bat-CoV pol 15635 | CCATCRTCMGAHARAATCATCATA   | -           |            |                    |                   |
| SARS-CoV-2              | ORF1ab | 2274 - CO-FW1     | GTGCTAAACCACCGCCTG         | +           | First PCR  | 368                | This study        |
|                         |        | 2275 - CO-REV1    | CAGATCATGGTTGCTTTGTAGGT    | -           |            |                    |                   |
|                         |        | 2276 - CO-FW2     | CGCCTGGAGATCAATTTAAACAC    | +           | Nested PCR | 332                |                   |
|                         |        | 2277 - CO-REV2    | ACCTGTAAAACCCCATTTGTTGA    | -           |            |                    |                   |
| SARS-CoV-2              | S      | WuhanCoV-sp1-f    | TTGGCAAATTC AAGACTCACTTT   | +           | First PCR  | 547                | Nao et al., 2020  |
|                         |        | WuhanCoV-sp2-r    | TGTGGTTCATAAAAAATTCCTTTGTG | -           |            |                    |                   |
|                         |        | NIID_WH-1_F24381  | TCAAGACTCACTTTCTTCCAC      | +           | Nested PCR | 493                |                   |
|                         |        | NIID_WH-1_R24873  | ATTTGAAACAAAGACACCTTCAC    | -           |            |                    |                   |

medRxiv preprint doi: <https://doi.org/10.1101/2020.04.25.20079830>; this version posted May 7, 2020. The copyright holder for this preprint (which was not certified by peer review) is the author/funder, who has granted medRxiv a license to display the preprint in perpetuity. It is made available under a [CC-BY-NC-ND 4.0 International license](#).

225 **Table 2: Results of SARS-CoV-2 detection in the study period**

| City and WWTP   | Date of sampling |        |        |                |        |        |                |        |
|-----------------|------------------|--------|--------|----------------|--------|--------|----------------|--------|
|                 | 03 Feb           | 19 Feb | 23 Feb | 24 Feb         | 26 Feb | 28 Feb | 31 Mar         | 02 Apr |
| Milan – plant A |                  | ×      |        | ○ <sup>a</sup> | ×      | ×      |                |        |
| Milan – plant B | ×                |        | ×      |                | ×      | ○●     |                |        |
| Rome – plant C1 |                  |        |        |                |        |        | ○ <sup>a</sup> | ○      |
| Rome – plant C2 |                  |        |        |                |        |        | ○              | ○●     |

226 × SARS-CoV-2 not detected; ○ SARS-CoV-2 detected (ORF1ab); ● SARS-CoV-2 detected (spike)

227 <sup>a</sup> weak positive

228

229 **Fig. 1: Position on SARS-CoV-2 genome of the primers used in the study. Modified from**  
230 **Viralzone (<https://viralzone.expasy.org/9076>)**

231

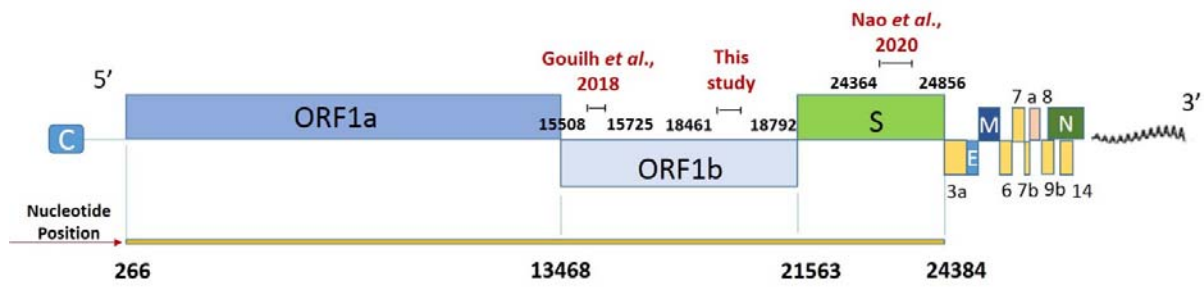

232

233

## Reference List

234

235 **Ahmed, W., Angel, N., Edson, J., et al. (2020).** First confirmed detection of SARS-CoV-2 in  
236 untreated wastewater in Australia: A proof of concept for the wastewater surveillance of  
237 COVID-19 in the community. *Science of the Total Environment*.  
238 <https://doi.org/10.1016/j.scitotenv.2020.138764>

239 **Ar Gouilh, M., Puechmaille, S. J., Diancourt, L., Vandebogaert, M., Serra-Cobo, J., Lopez**  
240 **Roïg, M., et al. (2018).** SARS-CoV related Betacoronavirus and diverse Alphacoronavirus  
241 members found in western old-world. *Virology*, **517**, 88–97.

242 **Assessorato alla Sanità e all'Integrazione Socio Sanitaria della Regione Lazio; Ministero della**  
243 **Salute** – Bulletin 31.03.2020: [http://www.salute.gov.it/imgs/C\\_17\\_notizie\\_4370\\_0\\_file.pdf](http://www.salute.gov.it/imgs/C_17_notizie_4370_0_file.pdf)

244 **Bai, Y., Yao, L., Wei, T., Tian, F., Jin, D.Y., Chen, L., Wang, M. (2020).** Presumed  
245 Asymptomatic Carrier Transmission of COVID-19. *JAMA*, 323(14), 1406–7.  
246 doi:10.1001/jama.2020.2565.

247 **Bisseux, M., Colombet, J., Mirand, A., Roque-Afonso, AM., Abravanel, F., Izopet, J.,**  
248 **Archimbaud, C., et al. (2018).** Monitoring human enteric viruses in wastewater and  
249 relevance to infections encountered in the clinical setting: a one-year experiment in central  
250 France, 2014 to 2015. *Euro Surveill.* **23**(7):17-00237. doi: 10.2807/1560-  
251 7917.ES.2018.23.7.17-00237.

252 **Chen, Y., Chen, L., Deng, Q., Zhang, G., Wu, K., Ni, L., et al. (2020).** The Presence of  
253 SARS-CoV-2 RNA in Feces of COVID-19 Patients. *J Med Virol*. Accepted Author  
254 Manuscript.

255 **Corman, V. M., Landt, O., Kaiser, M., Molenkamp, R., Meijer, A., Chu, D. K., et al. (2020).**  
256 Detection of 2019 novel coronavirus (2019-nCoV) by real-time RT-PCR. *Euro surveillance*:

- 257           bulletin Europeen sur les maladies transmissibles = European communicable disease  
258           bulletin, **25**(3), 2000045.
- 259   **Han, M. S., Seong, M.-W., Heo, E. Y, Park, J. H., Kim, N., Shin, S., et al. (2020).** Sequential  
260           analysis of viral load in a neonate and her mother infected with SARS-CoV-2. *Clinical*  
261           *Infectious Diseases*. ciaa447. <https://doi.org/10.1093/cid/ciaa447>
- 262   **Iaconelli, M., Muscillo, M., Della Libera, S., Fratini, M., Meucci, L., De Ceglia, M., Giacosa,**  
263           **D., La Rosa, G. (2017).** One-year Surveillance of Human Enteric Viruses in Raw and  
264           Treated Wastewaters, Downstream River Waters, and Drinking Waters. *Food Environ Virol.*  
265           **9** (1):79-88. doi: 10.1007/s12560-016-9263-3.
- 266   **Katayama, H., Haramoto, E., Oguma, K., Yamashita, H., Tajima, A., Nakajima, H., Ohgaki,**  
267           **S. (2008).** One-year monthly quantitative survey of noroviruses, enteroviruses, and  
268           adenoviruses in wastewater collected from six plants in Japan. *Water Res.* 42:1441–1448
- 269   **Kumar, S., Stecher, G., Li, M., Knyaz, C., and Tamura, K. (2018).** Molecular Biology and  
270           Evolution 35:1547-1549
- 271   **La Rosa, G., Pourshaban, M., Iaconelli, M., Muscillo, M. (2010).** Quantitative real-time PCR of  
272           enteric viruses in influent and effluent samples from wastewater treatment plants in Italy.  
273           *Ann Ist Super Sanità.* 46:266–273
- 274   **La Rosa, G. & Muscillo, M. (2013).**Molecular detection of viruses in water and sewage . In  
275           *Viruses in food and water: risks, surveillance and control.* pp. 97-125.
- 276   **Lescure, F. X., Bouadma, L., Nguyen, D., Parisey, M., Wicky, P. H., Behillil, S., et al. (2020).**  
277           Clinical and virological data of the first cases of COVID-19 in Europe: a case series. *Lancet.*  
278           *Infect Dis.* S1473-3099(20)30200-0. Advance online publication.  
279           [https://doi.org/10.1016/S1473-3099\(20\)30200-0](https://doi.org/10.1016/S1473-3099(20)30200-0)

- 280 **Lo, I. L., Lio, C. F., Cheong, H. H., Lei, C. I., Cheong, T. H., Zhong, X., et al. (2020).**  
281 Evaluation of SARS-CoV-2 RNA shedding in clinical specimens and clinical characteristics  
282 of 10 patients with COVID-19 in Macau. *International journal of biological sciences*  
283 **16**(10), 1698–1707.
- 284 **Martinez Wassaf, G.M., Pisano, M.B., Barril, P.A., Elbarcha, O.C., Pinto, M.A., Mendes de,**  
285 **O.J., et al.(2014).** First detection of hepatitis E virus in Central Argentina: Environmental  
286 and serological survey. *J. Clin. Virol.* **61**, 334–339.
- 287 **Medema, G., Heijnen, L., Elsinga, G., Italiaander, R. & Brouwer, A. (2020).** Presence of  
288 SARS-Coronavirus-2 in sewage. *medRxiv preprint*.
- 289 **Nao, N., Shirato, K., Katano, H., Matsuyama, S. & Takeda M. (2020).** Detection of second case  
290 of 2019-nCoV infection in Japan.
- 291 **Nicastri, E., D'Abramo, A., Faggioni, G., De Santis, R., Mariano, A., Lepore, L., et al. (2020).**  
292 Coronavirus disease (COVID-19) in a paucisymptomatic patient: epidemiological and  
293 clinical challenge in settings with limited community transmission, Italy, February  
294 2020. *Euro surveillance: bulletin Europeen sur les maladies transmissibles*, **25** (11),  
295 2000230. <https://doi.org/10.2807/1560-7917.ES.2020.25.11.2000230>
- 296 **Pastorino, B., Touret, F., Gilles, M., de Lamballerie, X., & Charrel, R.N. (2020).**Evaluation of  
297 heating and chemical protocols for inactivating SARS-CoV-2. *bioRxiv prept.*  
298 <https://doi.org/10.1101/2020.04.11.036855>
- 299 **Dipartimento della Protezione Civile** – Bulletin 28.02.2020: [https://github.com/pcm-dpc/COVID-](https://github.com/pcm-dpc/COVID-19/blob/master/dati-province/dpc-covid19-ita-province-20200228.csv)  
300 [19/blob/master/dati-province/dpc-covid19-ita-province-20200228.csv](https://github.com/pcm-dpc/COVID-19/blob/master/dati-province/dpc-covid19-ita-province-20200228.csv)
- 301 **Dipartimento della Protezione Civile** – Bulletin 31.03.2020: [https://github.com/pcm-dpc/COVID-](https://github.com/pcm-dpc/COVID-19/blob/master/dati-province/dpc-covid19-ita-province-20200331.csv)  
302 [19/blob/master/dati-province/dpc-covid19-ita-province-20200331.csv](https://github.com/pcm-dpc/COVID-19/blob/master/dati-province/dpc-covid19-ita-province-20200331.csv)
- 303 **Dipartimento della Protezione Civile** – Bulletin 20.04.2020:  
304 [http://www.protezionecivile.gov.it/media-comunicazione/comunicati-stampa/dettaglio/-](http://www.protezionecivile.gov.it/media-comunicazione/comunicati-stampa/dettaglio/-/asset_publisher/default/content/coronavirus-la-situazione-dei-contagi-in-ital-2)  
305 [/asset\\_publisher/default/content/coronavirus-la-situazione-dei-contagi-in-ital-2](http://www.protezionecivile.gov.it/media-comunicazione/comunicati-stampa/dettaglio/-/asset_publisher/default/content/coronavirus-la-situazione-dei-contagi-in-ital-2)



- 306 **Rothe, C., Schunk, M., Sothmann, P., Bretzel, G., Froeschl, G., Wallrauch, C., et al. (2020).**  
307 Transmission of 2019-nCoV infection from an asymptomatic contact in Germany. *N Engl J*  
308 *Med.* **382** (10): 970-1. [10.1056/NEJMc2001468](https://doi.org/10.1056/NEJMc2001468)
- 309 **Sinclair, R. G., Choi, C. Y., Riley, M. R. & Gerba, C. P. (2008).** Pathogen surveillance through  
310 monitoring of sewer systems. *Adv Appl Microbiol* **65**, 249-269.
- 311 **Suffredini, E., Iaconelli, M., Equestre, M., et al. (2018).** Genetic Diversity Among Genogroup II  
312 Noroviruses and Progressive Emergence of GII.17 in Wastewaters in Italy (2011-2016)  
313 Revealed by Next-Generation and Sanger Sequencing [published correction appears in Food  
314 Environ Virol. 2018 May 4;:]. *Food Environ Virol.* **10**(2), 141–150.
- 315 **World Health Organization. (2003).** Guidelines for Environmental Surveillance of Poliovirus  
316 Circulation. Available online: <https://apps.who.int/iris/handle/10665/67854> (accessed on 27  
317 February 2020).
- 318 **World Health Organization. (2020).** Advice on the use of masks in the context of COVID-19:  
319 interim guidance, 6 April 2020. World Health Organization.  
320 <https://apps.who.int/iris/handle/10665/331693>.
- 321 **Wu, F., Xiao A., Zhang, J., Gu X., Lee, W.L., Kauffman, K., et al. (2020).** SARS-CoV-2 titers  
322 in wastewater are higher than expected from clinically confirmed cases. *medRxiv prep.*  
323 <https://doi.org/10.1101/2020.04.05.20051540>
- 324 **Wurtzer, S., Marechal, V., Mouchel, JM. Moulin, L. (2020).** Time course quantitative detection  
325 of SARS-CoV-2 in Parisian wastewaters correlates with COVID-19 confirmed cases.  
326 *medRxiv prep.* doi: <https://doi.org/10.1101/2020.04.12.20062679>
- 327 **Xagorarakis, I. & O'Brien, E. (2020).** Wastewater-Based Epidemiology for Early Detection of  
328 Viral Outbreaks. In *Women in Water Quality*, pp. 75-97. Edited by C. O'Bannon D.(eds)  
329 Women in Water Quality. Women in Engineering and Science. Springer.
- 330
- 331
